# Supplementary material
Source: PubMed Central journal article supplement (PMC7549311)
Supplement: nxaa217_supplemental_file.pdf [file nxaa217_supplemental_file.pdf]

**Distinct effects of milk-derived and fermented dairy protein on gut microbiota and cardiometabolic markers in diet-induced obese mice.**

**Laís Rossi Perazza & Noémie Daniel**

***Online Supplementary Material***

## Supplementary Data

**Supplemental Table 1:** Chemical composition of MP, FMP and YP lyophilized products.

|                                                    | <b>MP<br/>(Milk Product)</b> | <b>FMP<br/>(Fermented Milk<br/>Product)</b> | <b>YP<br/>(greek Yogurt Product)</b> |
|----------------------------------------------------|------------------------------|---------------------------------------------|--------------------------------------|
| <b>Total solids (TS, %)</b>                        | 96.1 ± 0.75                  | 96.5 ± 0.15                                 | 94.4 ± 0.21                          |
| <b>Total nitrogen (TN, %)</b>                      | 9.27 ± 0.07                  | 9.20 ± 0.03                                 | 9.03 ± 0.07                          |
| <b>Total nitrogen protein (TNP, %)<sup>1</sup></b> | 59.1 ± 0.42                  | 58.7 ± 0.19                                 | 57.6 ± 0.42                          |
| <b>Non-nitrogen protein (NPN, %)</b>               | 0.19 ± 0.00                  | 0.20 ± 0.01                                 | 0.36 ± 0.01                          |
| <b>True protein (TP, %)<sup>2</sup></b>            | 57.9                         | 57.4                                        | 55.3                                 |
| <b>NPN/TN ratio</b>                                | 0.02                         | 0.02                                        | 0.04                                 |
| <b>Lactose (%)</b>                                 | 27.8 ± 0.14                  | 12.8 ± 0.02                                 | 3.23 ± 0.14                          |
| <b>Galactose (%)</b>                               | <LD <sup>3</sup>             | 4.58 ± 0.01                                 | 10.9 ± 0.44                          |
| <b>Fat (%)</b>                                     | 1.11 ± 0.04                  | 1.18 ± 0.03                                 | 1.15 ± 0.02                          |
| <b>Cholesterol (mg/100g)</b>                       | 39.5 ± 1.41                  | 38.6 ± 1.05                                 | 38.5 ± 0.56                          |
| <b>Ash (%)</b>                                     | 7.95 ± 0.01                  | 7.68 ± 0.12                                 | 7.65 ± 0.03                          |
| <b>Organic acids (mg/g) :</b>                      |                              |                                             |                                      |
| <b>Acetic</b>                                      | <LD                          | <LD                                         | <LD                                  |
| <b>Citric</b>                                      | 16.5 ± 0.11                  | 12.3 ± 0.11                                 | 15.1 ± 0.55                          |
| <b>Lactic</b>                                      | <LD                          | 218 ± 1.15                                  | 119.1 ± 4.63                         |
| <b>Cations (g/100g) :</b>                          |                              |                                             |                                      |
| <b>Ca</b>                                          | 2.03 ± 0.05                  | 1.92 ± 0.05                                 | 1.95 ± 0.02                          |
| <b>Na</b>                                          | 0.20 ± 0.01                  | 0.35 ± 0.01                                 | 0.32 ± 0.00                          |
| <b>K</b>                                           | 1.06 ± 0.05                  | 1.05 ± 0.05                                 | 1.02 ± 0.04                          |
| <b>Mg</b>                                          | 0.11 ± 0.00                  | 0.12 ± 0.00                                 | 0.13 ± 0.00                          |
| <b>Anions (g/100g) :</b>                           |                              |                                             |                                      |
| <b>P/PO<sub>4</sub><sup>-3</sup></b>               | 1.24 ± 0.06                  | 1.45 ± 0.02                                 | 1.44 ± 0.02                          |
| <b>Cl</b>                                          | 0.34 ± 0.02                  | 0.25 ± 0.01                                 | 0.30 ± 0.01                          |
| <b>S/SO<sub>4</sub><sup>-2</sup></b>               | 0.09 ± 0.00                  | 0.03 ± 0.00                                 | 0.03 ± 0.00                          |

<sup>1</sup>Values are mean ± standard deviation (n ≥ 3)

<sup>2</sup>TNP = TN x 6,38

<sup>3</sup>TP = (TN-NPN) x 6,38. TP values are used for the calculation of NPN

<sup>4</sup><LD : values below the limit of detection.

<sup>5</sup>LD was 0.1 % for galactose and 1 mg/g for organic acids.

**Experimental diets**

| Non-dairy protein | Milk product                                           | Fermented milk product                                           | Yogurt product                                           |
|-------------------|--------------------------------------------------------|------------------------------------------------------------------|----------------------------------------------------------|
| ↓                 | ↓                                                      | ↓                                                                | ↓                                                        |
| No replacement    | HFHS with 50% of protein replacement with milk product | HFHS with 50% of protein replacement with fermented milk product | HFHS with 50% of protein replacement with yogurt product |
| ↓                 | ↓                                                      | ↓                                                                | ↓                                                        |
| <b>NDP</b>        | <b>MP</b>                                              | <b>FMP</b>                                                       | <b>YP</b>                                                |

**Experimental design**

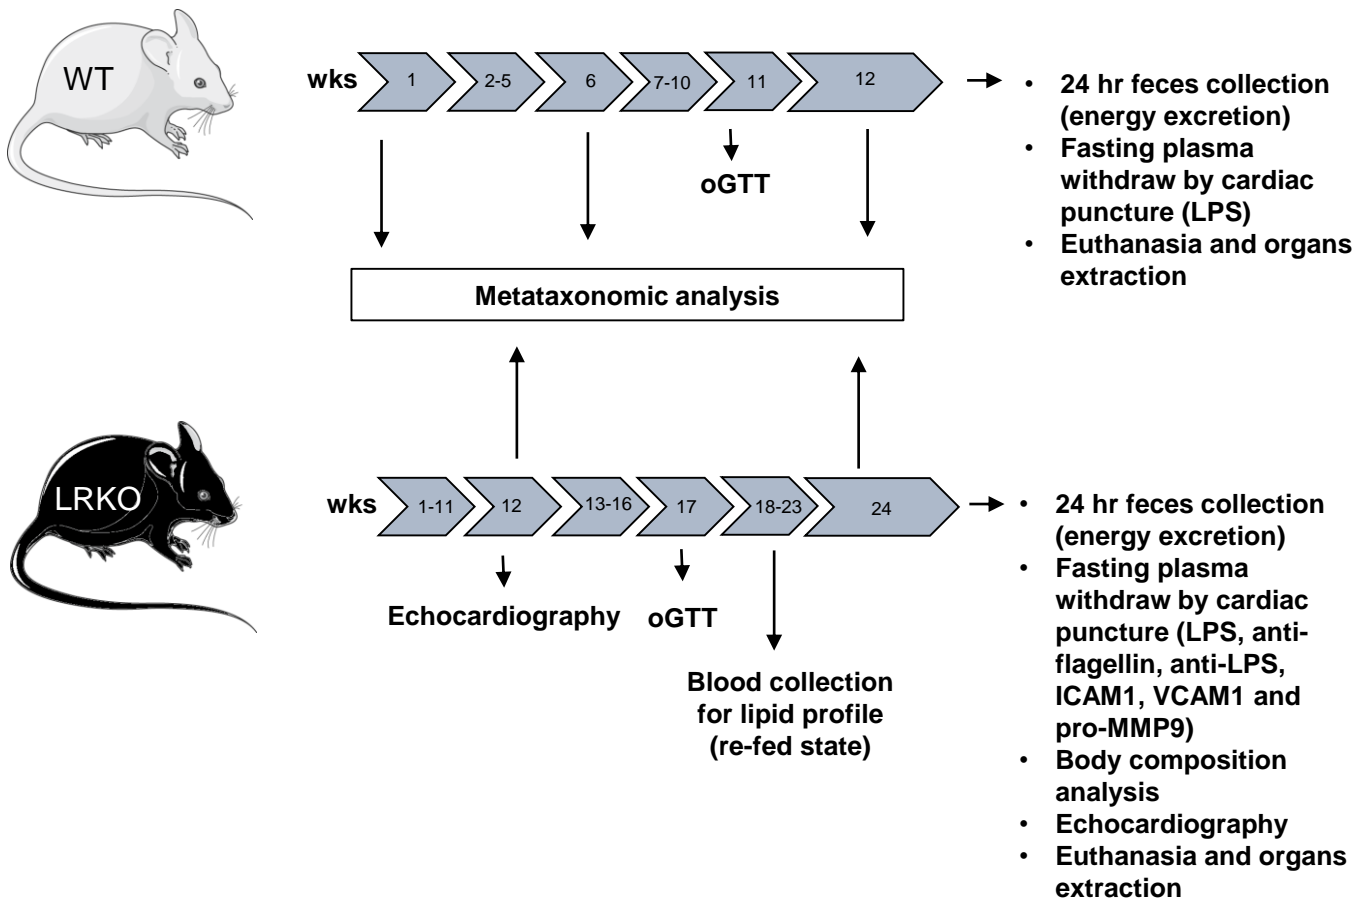

**Supplemental Figure 1. Experimental study design.**

\* Illustrations were obtained on <https://smart.servier.com>, published by LES LABORATOIRES SERVIER, SAS.

Supplemental Figure 2

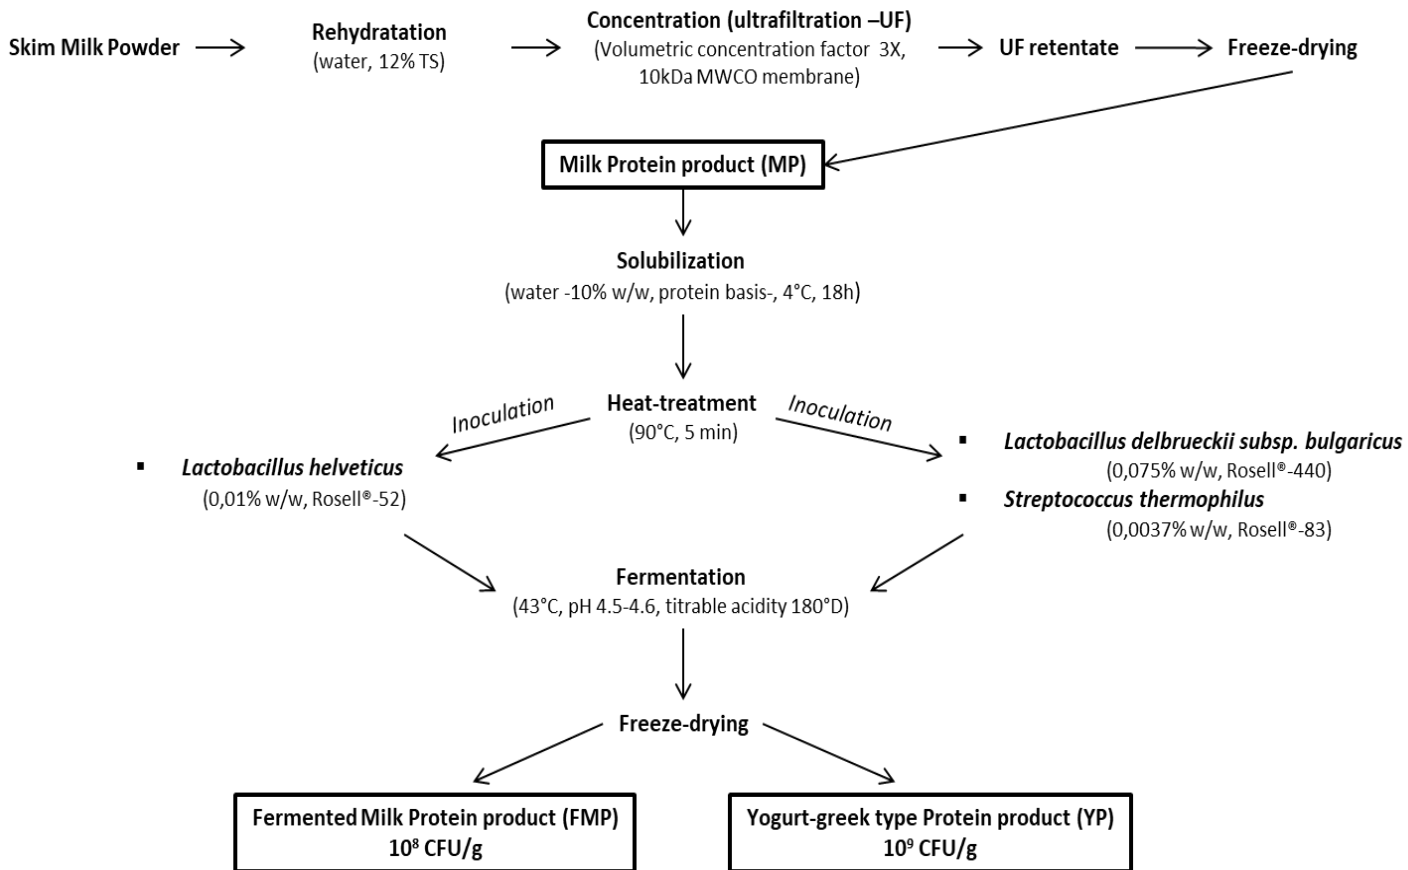

Supplemental Figure 2. Detailed formulation process of the fermented dairy products. CFU: Colony-forming unit.

Supplemental Figure 3

■ > 10 kDa ■ 10 - 5 kDa ■ 5 - 2 kDa ■ < 2 kDa

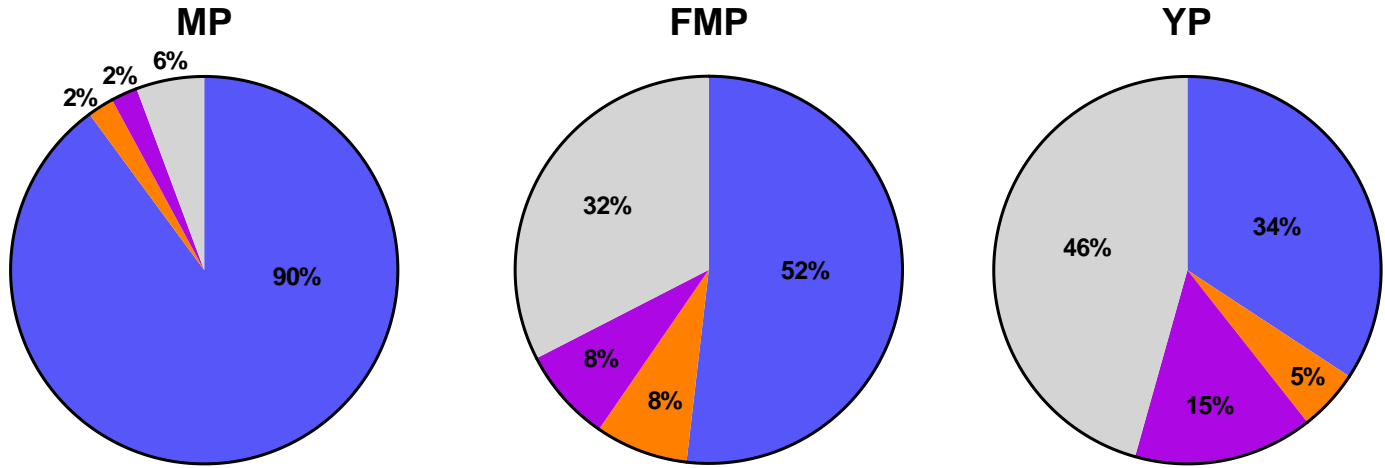

**Supplemental Figure 3. Molecular weight (Da) distribution of MP, FMP and YP products peptides.** Molecular weight distribution profile of protein/peptide components of dairy products. FMP: fermented milk product; MP: milk product; YP: yogurt product.

Supplemental Figure 4

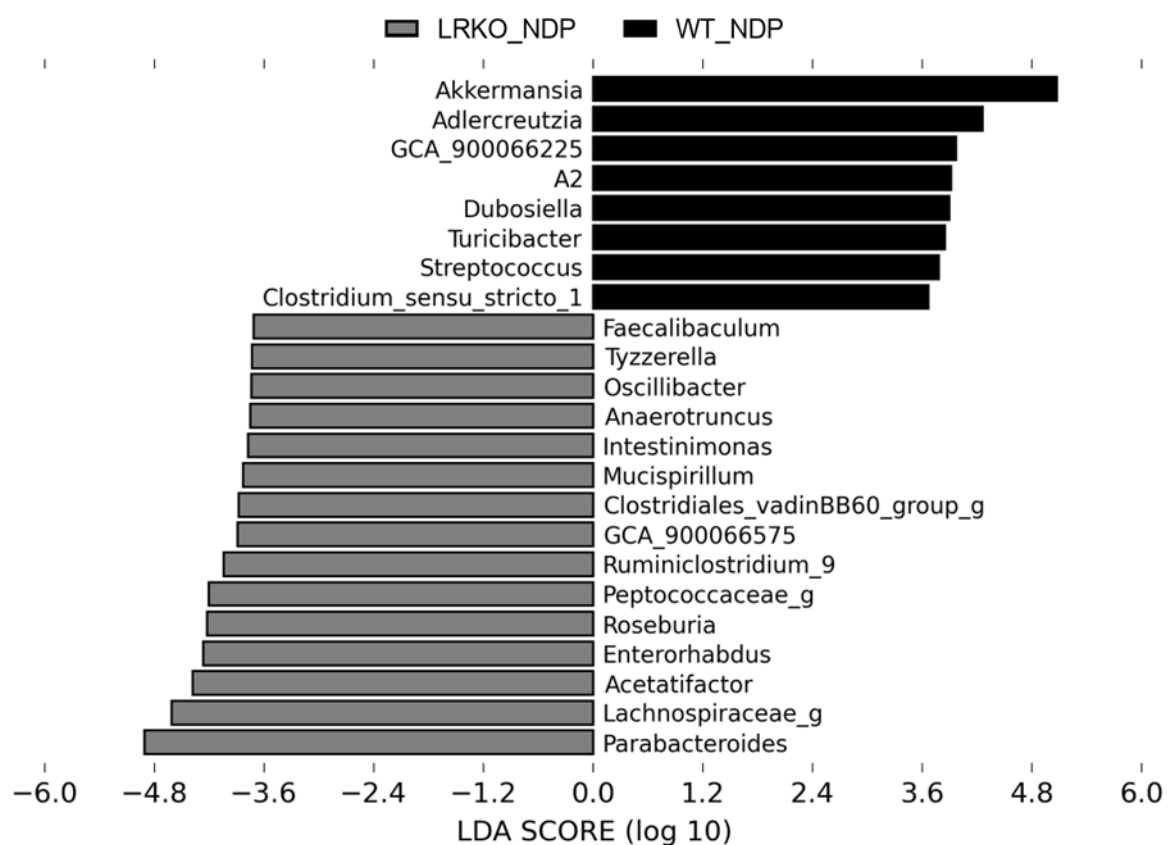

**Supplemental Figure 4. Genotype comparisons on taxa relative abundances. Related to Figures 1-2.** Linear discriminant analysis with effect size (LEfSe) analysis of bacterial taxa present in WT *versus* LRKOB100 mice at week 12. NDP: non-dairy protein.

Supplemental Figure 5

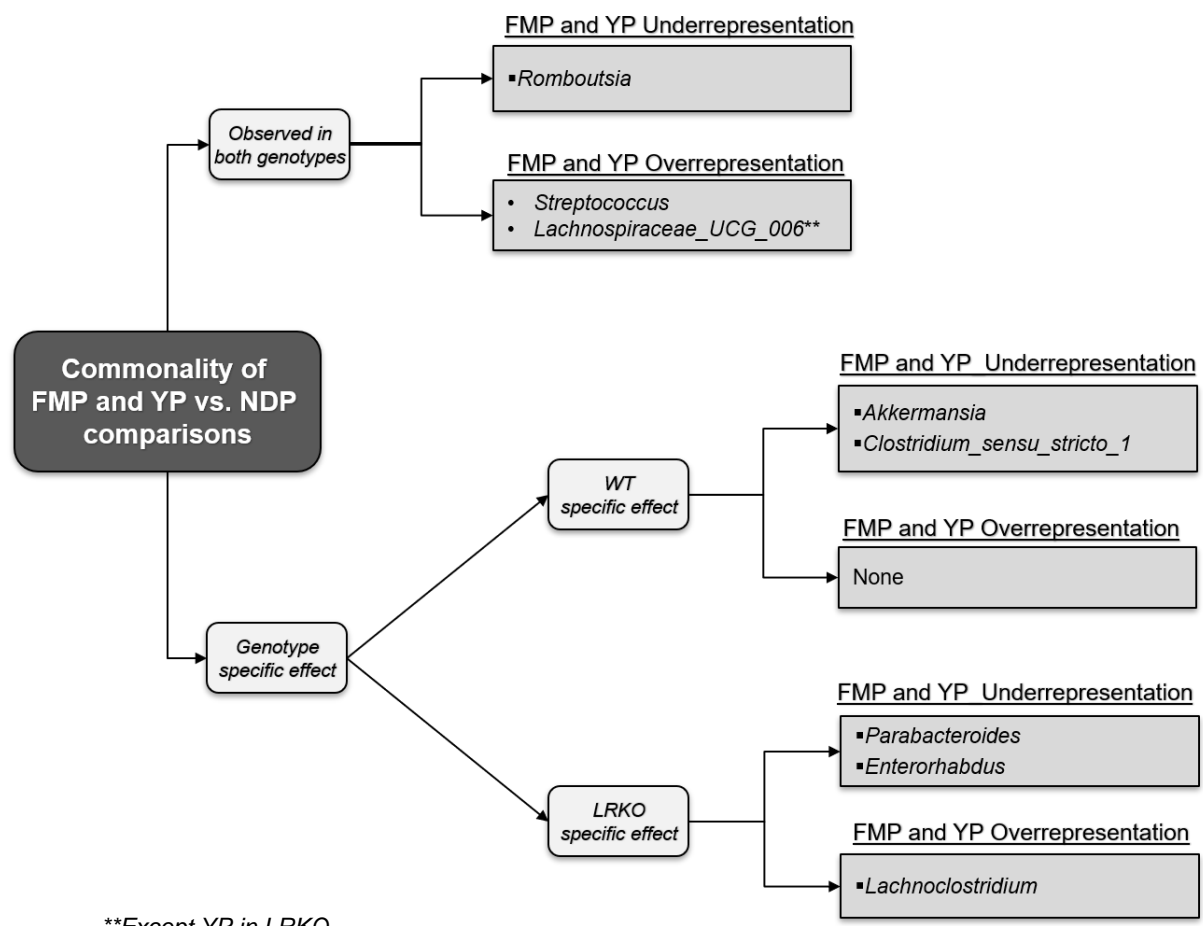

**Supplemental Figure 5. Fermented dairy profile: Effect of FMP and YP in fecal metataxonomic abundances compared to NDP, related to Figure 2.** FMP: fermented milk product; NDP: non-dairy protein; YP: yogurt product.

## Supplemental Figure 6

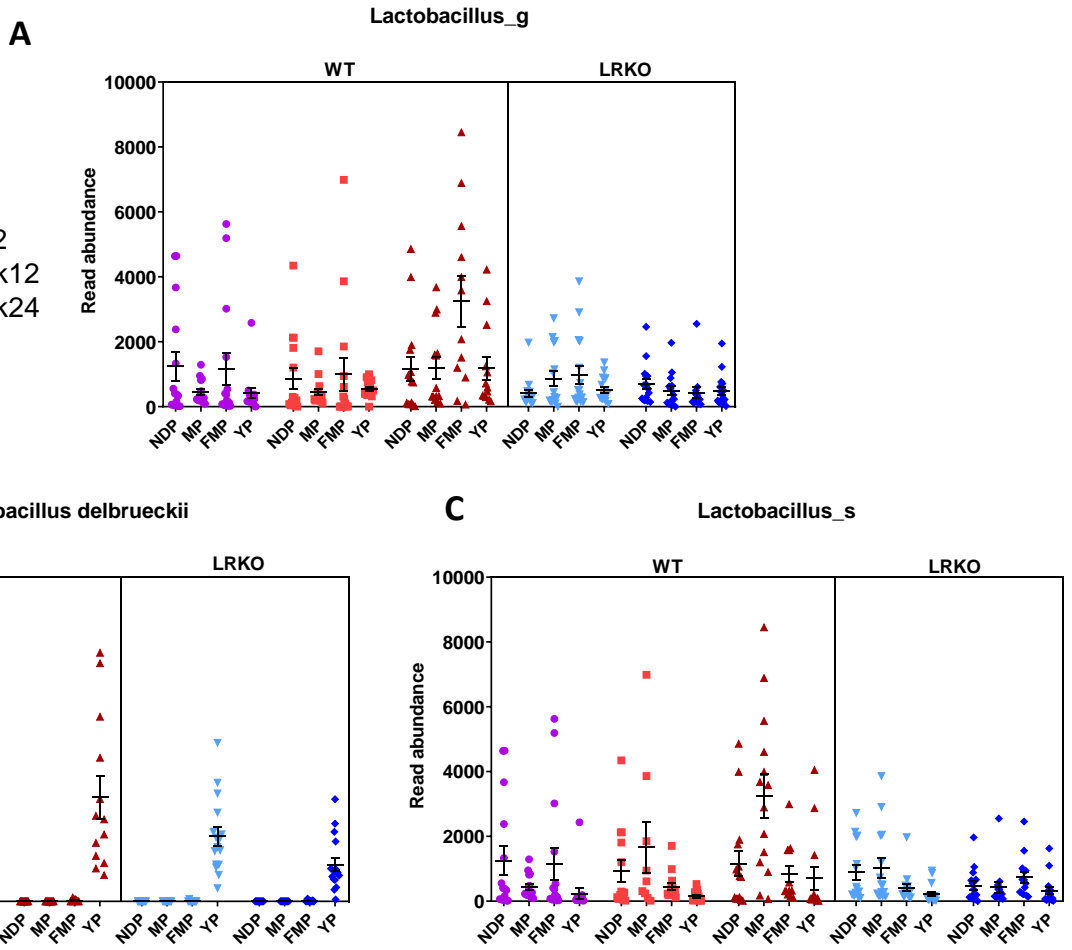

**Supplemental Figure 6. Effect of dairy products consumption in *Lactobacillus* species, related to Figures 1-3.** Read abundance of (A) *Lactobacillus* genus and (B) *Lactobacillus delbrueckii* and (C) unknown *Lactobacillus* species. Values are mean  $\pm$  SEM. FMP: fermented milk product; MP: milk product; NDP: non-dairy protein; YP: yogurt product.



Supplemental Figure 7

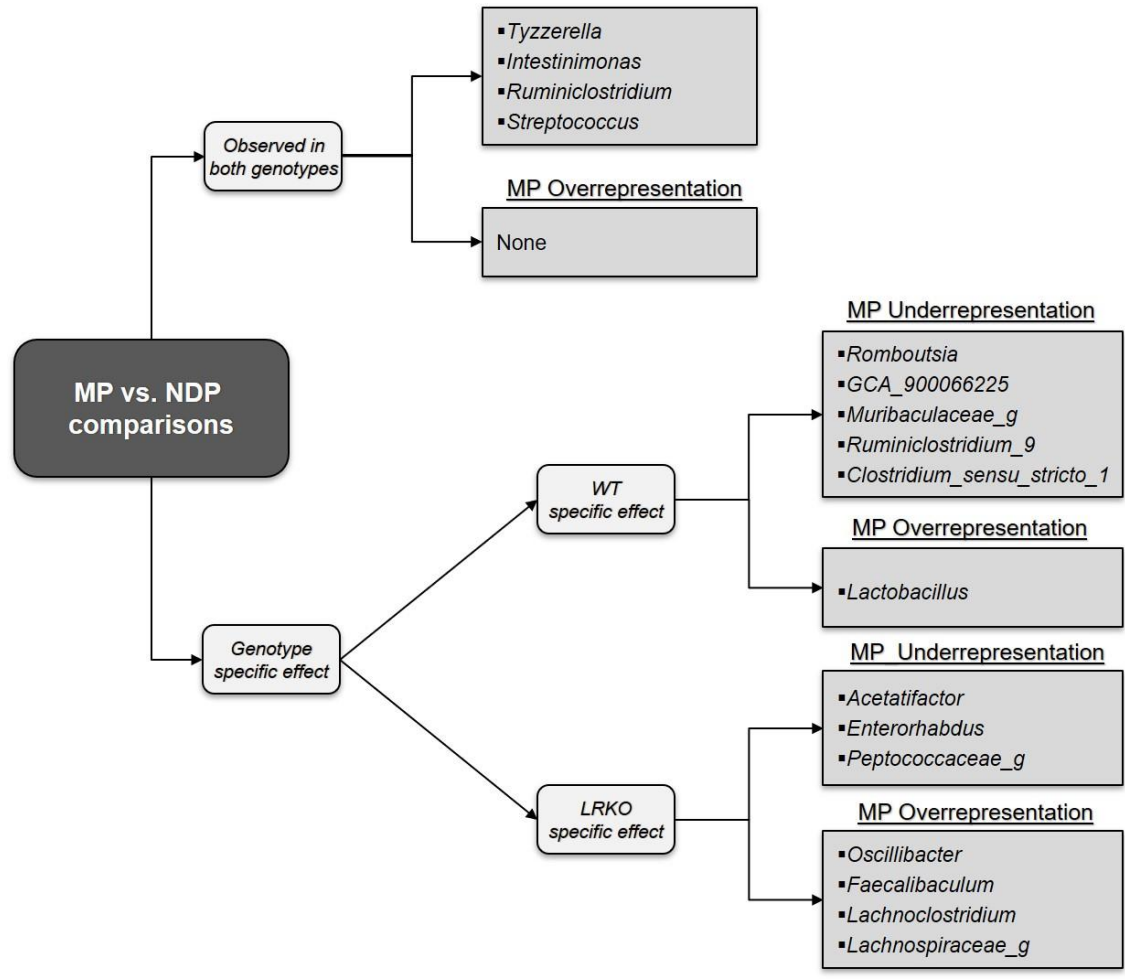

Supplemental Figure 7. Exclusive effect of non-fermented MP in fecal metataxonomic abundances compared to NDP, related to Figure 2. MP: milk product; NDP: non-dairy protein.

Supplemental Figure 8

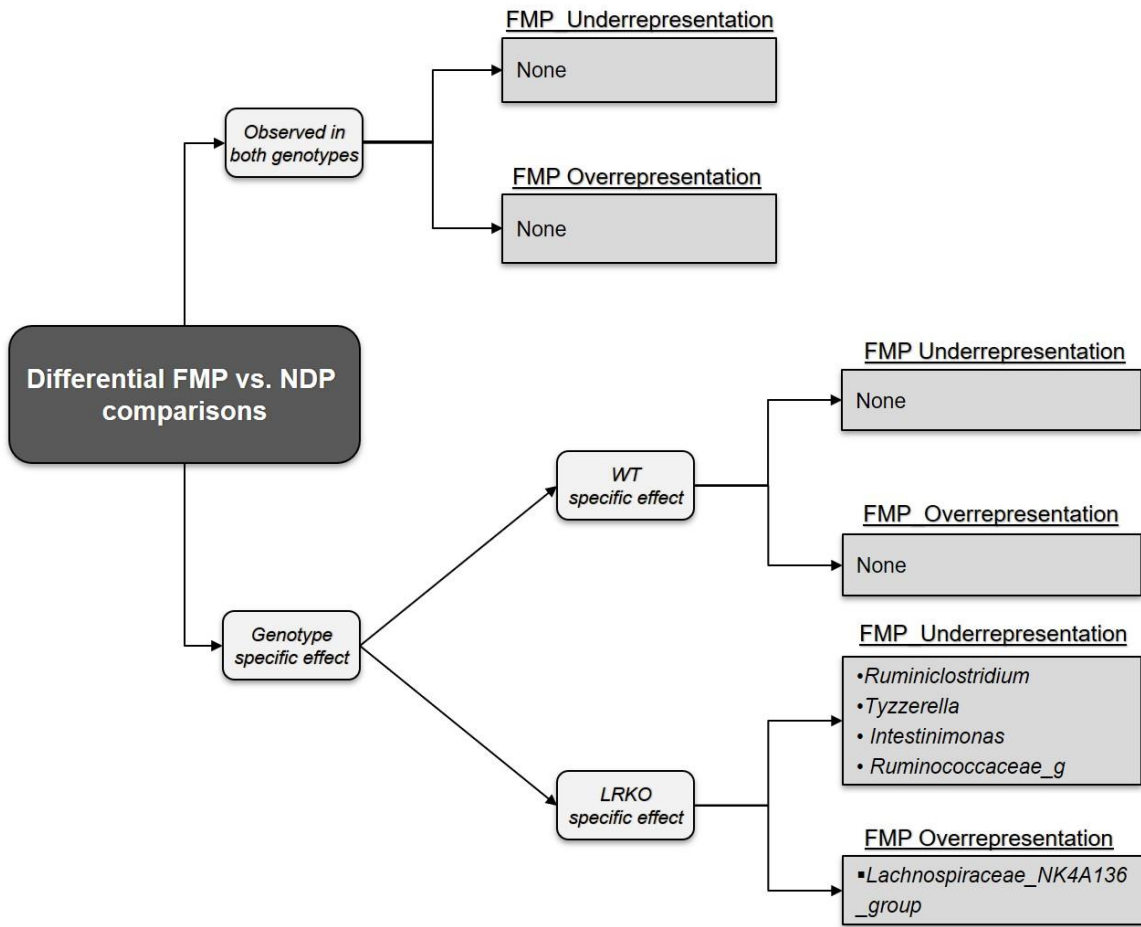

Supplemental Figure 8. Exclusive effect of FMP in fecal metataxonomic abundances compared to NDP, related to Figure 2. FMP: fermented milk product; NDP: non-dairy protein.

Supplemental Figure 9

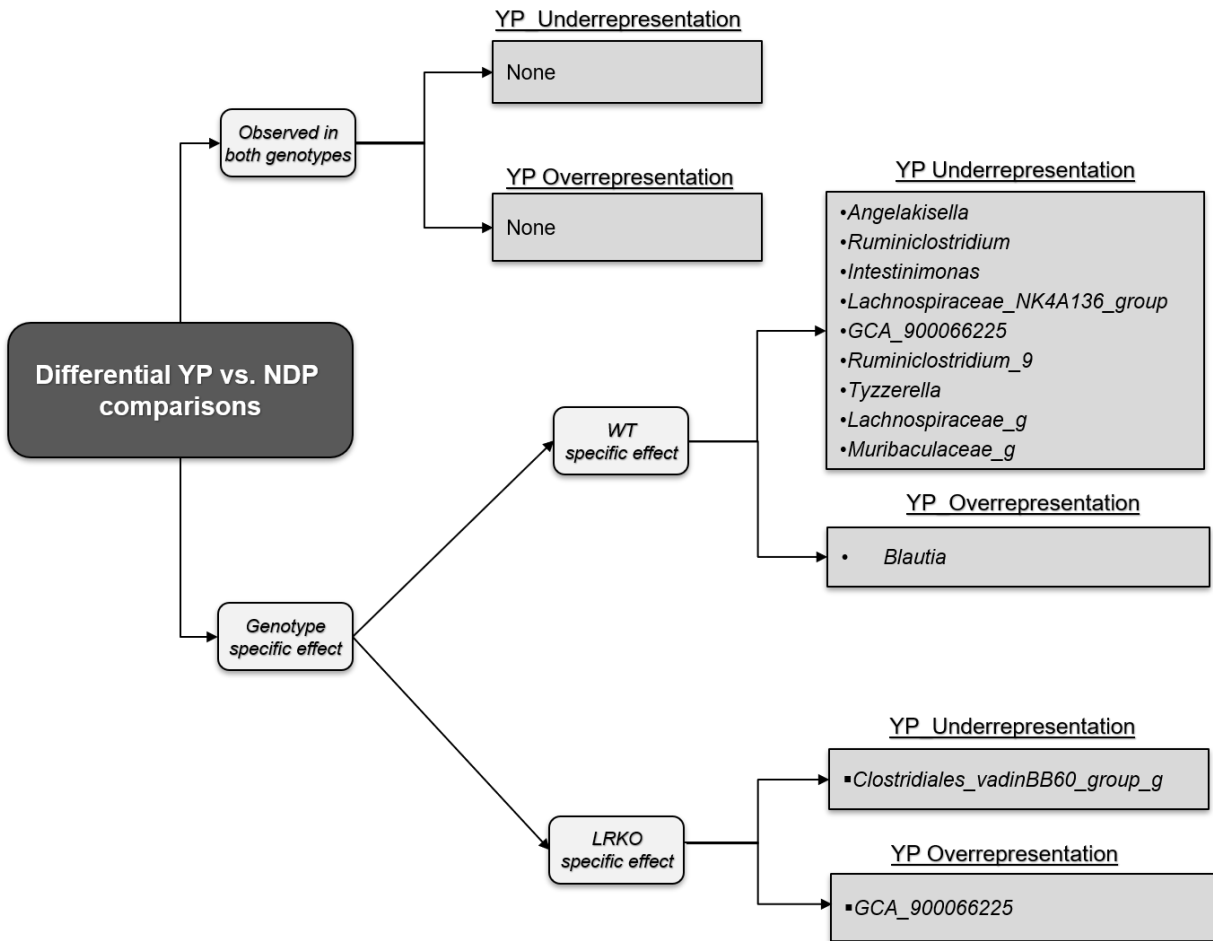

Supplemental Figure 9. Exclusive effect of YP in fecal metataxonomic abundances compared to NDP, related to Figure 2. NDP: non-dairy protein; YP: yogurt product.

Supplemental Figure 10

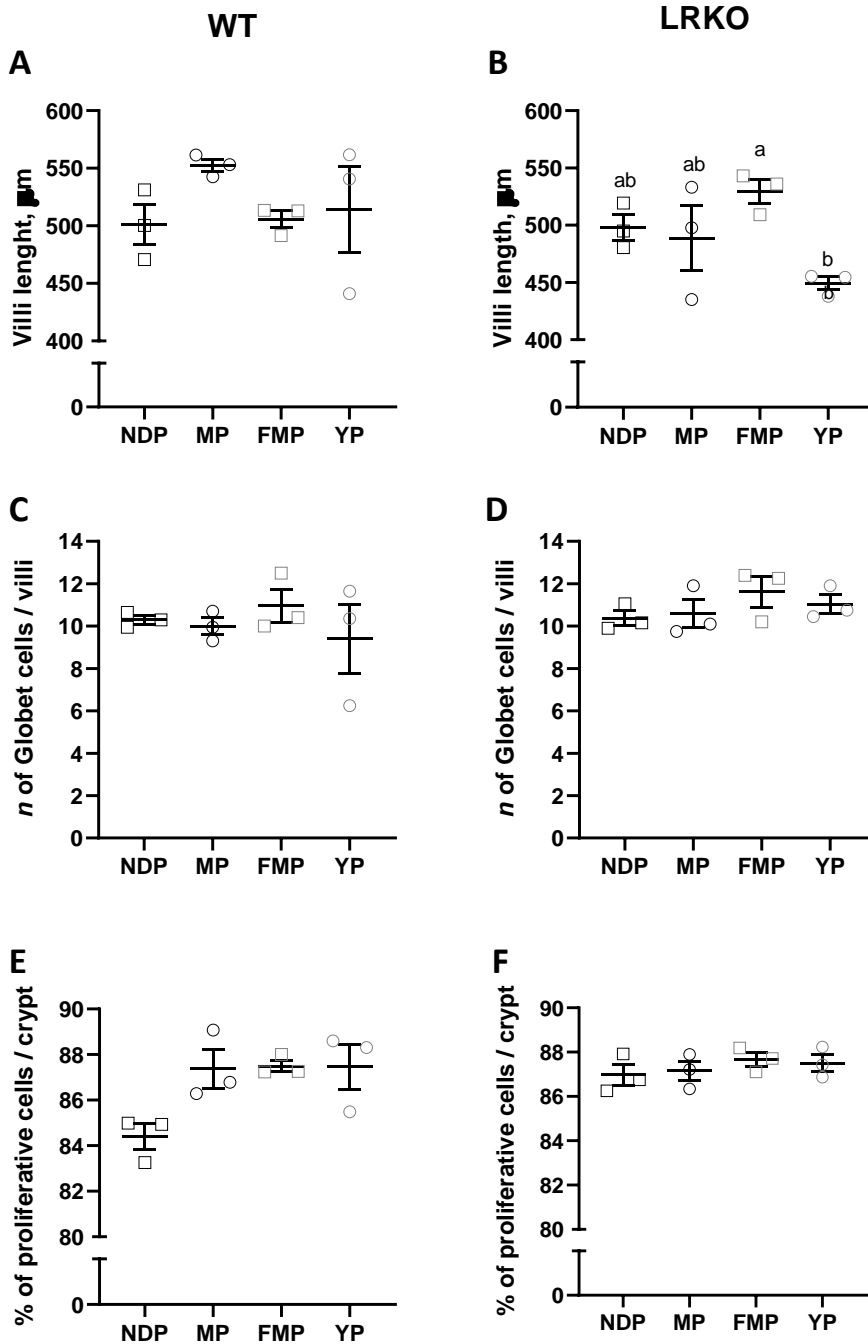

**Supplemental Figure 10. Effect of dairy products consumption in jejunal histology, related to Figure 1-3.** Villi length, Goblet cells and cell proliferation were quantified in jejunum of WT (A, C and E, respectively) and LRKO (B, D and F, respectively) mice, n=3 (WT and LRKO). Values are mean  $\pm$  SEM. All P values were determined by one-way ANOVA followed by Tukey's post hoc test. Within genotype, labeled means without a common letter differ,  $P < 0.05$ . FMP: fermented milk product; MP: milk product; NDP: non-dairy protein; YP: yogurt product.
